# Supplementary material for: Role of F− in the hydrolysis–condensation mechanisms of silicon alkoxide Si(OCH3)4: a DFT investigation
Source: Royal Society of Chemistry journal article supplement (doi:10.1039/c3nj41140k), 2013-01-01
Supplement: c3nj41140k.pdf [file c3nj41140k.pdf]

## Supporting Information

**Table S1** The lowest frequencies (in  $\text{cm}^{-1}$ ), Gibbs free energies (in a.u.), entropies  $S_m^\ominus$  (in  $\text{cal}\cdot\text{K}\cdot\text{mol}^{-1}$ ), entropic corrections ( $-T\Delta S$ , in  $\text{kJ}\cdot\text{mol}^{-1}$ ) and relative free energies after entropic correction ( $\Delta G$ , in  $\text{kJ}\cdot\text{mol}^{-1}$ ) for the hydrolysis and dimerization of  $\text{Si}(\text{OCH}_3)_4$  in the aid of  $\text{F}^-$  based on gas-phase calculations at B3LYP/6-31G(d,p) level and CPCM SPE calculations at B3LYP/6-311++G(d,p) level.

| $\text{Si}(\text{OCH}_3)_4$ | Species                                                       | Frequencies | Entropies | $-T\Delta S$ | Gibbs free energies | $\Delta G$ |
|-----------------------------|---------------------------------------------------------------|-------------|-----------|--------------|---------------------|------------|
| First-order                 | $\text{Si}(\text{OCH}_3)_4 + \text{F}^- + \text{H}_2\text{O}$ | 47 - 1665   | 200.491   | -            | -926.639183         | 0.0        |
| hydrolysis                  | IM+ $\text{H}_2\text{O}$                                      | 53 1665     | 163.258   | 46.4         | -926.640709         | 42.4       |
|                             | F1-IM1                                                        | 55          | 130.351   | 87.5         | -926.639068         | 87.8       |
|                             | F1-TS                                                         | i776        | 122.983   | 96.7         | -926.606992         | 181.2      |
|                             | F1-IM2                                                        | 29          | 134.513   | 82.3         | -926.645664         | 65.3       |
|                             | F1-P+ $\text{CH}_3\text{OH}$                                  | 73 338      | 164.922   | 44.4         | -926.641207         | 39.1       |
| Second-order                | F1-P + $\text{H}_2\text{O}$                                   | 73 1665     | 153.264   | -            | -887.372490         | 0.0        |
| hydrolysis                  | F2-IM1                                                        | 51          | 121.939   | 39.1         | -887.375379         | 31.5       |
|                             | F2-TS                                                         | i759        | 116.557   | 45.8         | -887.341693         | 126.7      |
|                             | F2-IM2                                                        | 26          | 126.420   | 33.5         | -887.376755         | 22.3       |
|                             | F2-P+ $\text{CH}_3\text{OH}$                                  | 72 338      | 158.358   | -6.4         | -887.374501         | -11.7      |
| Third-order                 | F2-P + $\text{H}_2\text{O}$                                   | 72 1665     | 146.700   | -            | -848.105784         | 0.0        |
| hydrolysis                  | F3-IM1                                                        | 23          | 117.328   | 36.6         | -848.106070         | 35.8       |
|                             | F3-TS                                                         | i715        | 107.850   | 48.5         | -848.076678         | 124.9      |
|                             | F3-IM2                                                        | 24          | 117.768   | 36.1         | -848.113375         | 16.2       |
|                             | F3-P+ $\text{CH}_3\text{OH}$                                  | 80 338      | 148.670   | -2.5         | -848.110542         | -15.0      |
| Fourth-order                | F3-P + $\text{H}_2\text{O}$                                   | 80 1665     | 137.012   | -            | -808.841825         | 0.0        |
| hydrolysis                  | F4-IM1                                                        | 23          | 106.557   | 38.0         | -808.841680         | 38.4       |
|                             | F4-TS                                                         | i667        | 97.505    | 49.3         | -808.810487         | 131.6      |
|                             | F4-IM2                                                        | 31          | 109.358   | 34.5         | -808.843873         | 29.1       |
|                             | F4-P+ $\text{CH}_3\text{OH}$                                  | 106 338     | 140.429   | -4.3         | -808.841246         | -2.8       |
| First-order                 | F1-P+C1-1-P                                                   | 73 52       | 217.789   | -            | -1521.821224        | 0.0        |
| dimerization                | dF1-IM1                                                       | 9           | 183.540   | 42.7         | -1521.816556        | 55.0       |
|                             | dF1-TS                                                        | i806        | 170.351   | 59.2         | -1521.785225        | 153.7      |
|                             | dF1-IM2                                                       | 28          | 174.964   | 53.4         | -1521.834043        | 19.7       |
|                             | dF1-P+ $\text{CH}_3\text{OH}$                                 | 16 338      | 211.809   | 7.5          | -1521.835565        | -30.2      |
| Second-order                | F2-P+C1-2-P                                                   | 72 67       | 201.741   | -            | -1443.289651        | 0.0        |
| dimerization                | dF2-IM1                                                       | 36          | 152.802   | 61.0         | -1443.293200        | 51.7       |
|                             | dF2-TS                                                        | i805        | 150.454   | 64.0         | -1443.262708        | 134.7      |
|                             | dF2-IM2                                                       | 37          | 153.594   | 60.1         | -1443.304447        | 21.3       |
|                             | dF2-P+ $\text{CH}_3\text{OH}$                                 | 29 338      | 192.183   | 11.9         | -1443.304013        | -25.8      |
| third-order                 | F3-P+C1-3-P                                                   | 80 72       | 181.986   | -            | -1364.760756        | 0.0        |
| dimerization                | dF3-IM1                                                       | 32          | 134.773   | 62.7         | -1364.763331        | 52.1       |
|                             | dF3-TS                                                        | i985        | 130.857   | 63.8         | -1364.729899        | 144.8      |
|                             | dF3-IM2                                                       | 29          | 140.483   | 51.8         | -1364.771895        | 22.6       |

---

|              |                           |         |         |      |              |       |
|--------------|---------------------------|---------|---------|------|--------------|-------|
|              | dF3-P+ CH <sub>3</sub> OH | 37 338  | 172.409 | 11.9 | -1364.774566 | -24.4 |
| Fourth-order | F4-P+Si(OH) <sub>4</sub>  | 106 201 | 163.432 | -    | -1286.225634 | 0.0   |
| dimerization | dF4-IM1                   | 57      | 113.419 | 62.4 | -1286.232688 | 43.9  |
|              | dF4-TS                    | i978    | 115.848 | 59.4 | -1286.198895 | 129.6 |
|              | dF4-IM2                   | 21      | 122.336 | 51.3 | -1286.242895 | 6.0   |
|              | dF4-P+ CH <sub>3</sub> OH | 43 1665 | 151.239 | 15.2 | -1286.240875 | -24.8 |

---

### Cartesian coordinates of all species

#### F<sup>-</sup>

-1 1

F 0.00000000 0.00000000 0.00000000

#### Si(OCH<sub>3</sub>)<sub>4</sub>

0 1

Si 0.00109300 -0.00090800 -0.00448700  
O -1.42283800 -0.66328700 -0.48683400  
O 0.27885800 -0.54329300 1.52207800  
O -0.16355900 1.62890700 -0.14216300  
O 1.30980000 -0.42227300 -0.90398200  
C -2.14626200 -0.25566000 -1.64370600  
H -3.15201400 -0.68077600 -1.58222800  
H -2.22372400 0.83508200 -1.70202000  
H -1.66604100 -0.62622700 -2.55739100  
C -0.71546300 -0.59427000 2.54012900  
H -1.04732400 0.41270800 2.82068400  
H -1.58559400 -1.17419500 2.21473700  
H -0.27506200 -1.07292500 3.41900200  
C 0.91849900 2.54852200 -0.03286300  
H 1.68637000 2.34824900 -0.78758100  
H 0.52197600 3.55572500 -0.18698600  
H 1.38058700 2.50423900 0.96108300  
C 1.94003400 -1.69774300 -0.84940600  
H 1.30453400 -2.47157900 -1.29638800  
H 2.87103400 -1.64005500 -1.42019000  
H 2.17103100 -1.98304800 0.18238100

#### IM

-1 1

Si -0.18772700 0.13489900 -0.26494100  
O 0.51808500 -1.02348900 -1.31856200  
O -1.38594000 -0.38018900 0.85649400  
O 0.24045300 1.78352100 -0.42550200  
O 1.02911500 -0.07159900 1.00818100  
C 1.78045300 -1.61023300 -1.20994000  
H 1.71979900 -2.64684500 -0.83057200

|   |             |             |             |
|---|-------------|-------------|-------------|
| H | 2.24920000  | -1.66565100 | -2.20760500 |
| H | 2.45217700  | -1.05696800 | -0.54294100 |
| C | -2.74240000 | -0.51711900 | 0.53046600  |
| H | -3.20865300 | 0.43445900  | 0.23772500  |
| H | -2.91527700 | -1.22158700 | -0.29578700 |
| H | -3.27595100 | -0.89766900 | 1.41708900  |
| C | 1.15037700  | 2.48377700  | 0.37468800  |
| H | 2.17767900  | 2.09807500  | 0.29666100  |
| H | 1.15811300  | 3.53691400  | 0.04689200  |
| H | 0.88881800  | 2.46081100  | 1.44230200  |
| C | 1.01866800  | -1.12330000 | 1.91850800  |
| H | 0.97619500  | -2.12165700 | 1.44344000  |
| H | 1.94602800  | -1.09934600 | 2.51963700  |
| H | 0.16457300  | -1.07312600 | 2.61138700  |
| F | -1.35120200 | 0.38881100  | -1.45291900 |

**H<sub>2</sub>O**

0 1

|   |            |             |             |
|---|------------|-------------|-------------|
| O | 0.00000000 | 0.00000000  | 0.11918800  |
| H | 0.00000000 | 0.75928600  | -0.47675400 |
| H | 0.00000000 | -0.75928600 | -0.47675400 |

**F1-IM1**

-1 1

|    |             |             |             |
|----|-------------|-------------|-------------|
| Si | -0.21159300 | 0.17264300  | 0.02114600  |
| O  | 0.21319100  | -0.30734100 | -1.56256700 |
| O  | -1.74354300 | 0.90265300  | 0.20768600  |
| O  | 0.93654200  | 0.01483000  | 1.29965900  |
| O  | -0.90925000 | -1.38122400 | 0.45784000  |
| C  | 0.93747900  | -1.47991800 | -1.82937700 |
| H  | 0.83458600  | -1.73350800 | -2.89611800 |
| H  | 2.00804800  | -1.33211700 | -1.61837500 |
| H  | 0.58349500  | -2.33686300 | -1.23835100 |
| C  | -2.01698700 | 2.25798600  | -0.03702400 |
| H  | -1.45508300 | 2.92987100  | 0.62583300  |
| H  | -1.78740300 | 2.55968500  | -1.06880600 |
| H  | -3.09143600 | 2.42798400  | 0.13412600  |
| C  | 0.94576800  | -1.00370000 | 2.27186000  |
| H  | 1.11991400  | -1.99767900 | 1.83960000  |
| H  | 1.75627500  | -0.78525400 | 2.98404400  |
| H  | 0.00091000  | -1.05751600 | 2.82648200  |
| C  | -2.04636500 | -1.86589200 | -0.18816600 |
| H  | -1.94809800 | -1.85822900 | -1.28781600 |
| H  | -2.22592700 | -2.91139800 | 0.11747700  |
| H  | -2.94761100 | -1.28258600 | 0.05764200  |
| F  | 0.51296600  | 1.69327700  | -0.28438900 |

|   |            |            |             |
|---|------------|------------|-------------|
| H | 2.70558000 | 0.46101900 | 0.45173400  |
| O | 3.18275800 | 0.83225100 | -0.31160800 |
| H | 2.43539400 | 1.31988100 | -0.69585700 |

**F1-TS**

-1 1

|    |             |             |             |
|----|-------------|-------------|-------------|
| Si | -0.15675100 | -0.01444700 | -0.17792200 |
| O  | -1.60208900 | -1.01399100 | -0.31438100 |
| O  | 1.45760700  | 0.66422200  | -0.18774800 |
| O  | 0.63021700  | -1.61984800 | 0.70630800  |
| O  | -0.60141600 | 0.68562100  | 1.33580200  |
| C  | -2.86382500 | -0.45547500 | -0.09950200 |
| H  | -3.11834000 | 0.31974500  | -0.84274500 |
| H  | -3.62693500 | -1.24904500 | -0.17226100 |
| H  | -2.94827400 | 0.00595000  | 0.89582800  |
| C  | 1.99522000  | 1.25060500  | -1.33535700 |
| H  | 1.95828200  | 0.57902400  | -2.20669800 |
| H  | 1.48009800  | 2.18290800  | -1.61946800 |
| H  | 3.05443800  | 1.49963700  | -1.14980200 |
| C  | 1.73896700  | -1.50869600 | 1.56550500  |
| H  | 1.48067500  | -0.84953200 | 2.40318100  |
| H  | 1.99757600  | -2.50121900 | 1.97003500  |
| H  | 2.61720100  | -1.08218000 | 1.06493400  |
| C  | -0.32205100 | 2.02420200  | 1.62435600  |
| H  | -0.86036800 | 2.72238400  | 0.95995600  |
| H  | -0.63961400 | 2.24398800  | 2.65739000  |
| H  | 0.75003400  | 2.25418700  | 1.53700400  |
| O  | 0.50396500  | -1.28609200 | -1.55201900 |
| H  | -0.34544500 | -1.69311100 | -1.78263500 |
| H  | 0.79234700  | -1.77700000 | -0.47225200 |
| F  | -0.75481000 | 1.13815600  | -1.24280800 |

**F1-IM2**

-1 1

|    |             |             |             |
|----|-------------|-------------|-------------|
| Si | -0.64448000 | 0.00500200  | -0.21124100 |
| O  | -1.81964600 | -1.31740100 | -0.14550400 |
| O  | 0.62134600  | 1.21988500  | -0.28788900 |
| O  | 2.95563900  | -1.63270700 | 0.36218800  |
| O  | -0.96667500 | 0.36350000  | 1.41695400  |
| C  | -3.15561400 | -1.08640000 | 0.17722800  |
| H  | -3.64675600 | -0.39553600 | -0.53001900 |
| H  | -3.71484100 | -2.03718300 | 0.14857900  |
| H  | -3.27327700 | -0.66130800 | 1.18751200  |
| C  | 1.15030900  | 1.60893900  | -1.52085300 |
| H  | 1.57229800  | 0.76193100  | -2.08699400 |
| H  | 0.39704300  | 2.09112400  | -2.16545100 |

|   |             |             |             |
|---|-------------|-------------|-------------|
| H | 1.96530800  | 2.33392700  | -1.36033500 |
| C | 3.59154400  | -0.37831700 | 0.43719700  |
| H | 4.34429000  | -0.41122400 | 1.23874400  |
| H | 4.12575300  | -0.11045400 | -0.49494800 |
| H | 2.88536800  | 0.43360800  | 0.65268100  |
| C | -0.40984500 | 1.41853700  | 2.15770900  |
| H | -0.50052100 | 2.38785000  | 1.65104900  |
| H | -0.93927200 | 1.47737700  | 3.12168600  |
| H | 0.65833700  | 1.26484900  | 2.36523300  |
| O | 0.47128900  | -1.18551900 | -0.76682400 |
| H | -0.04404300 | -2.00301500 | -0.80661200 |
| H | 2.07547600  | -1.47814800 | -0.05024600 |
| F | -1.55960300 | 0.81306200  | -1.33917600 |

**F1-P**

-1 1

|    |             |             |             |
|----|-------------|-------------|-------------|
| Si | 0.02692500  | -0.20959000 | -0.13631600 |
| O  | 1.73103600  | -0.64610600 | -0.42798600 |
| O  | -1.66618400 | 0.21072000  | 0.08002400  |
| O  | 0.45817200  | 1.43606600  | -0.26077000 |
| C  | 2.74158300  | -0.22430300 | 0.42910900  |
| H  | 2.59741500  | -0.58257900 | 1.46421300  |
| H  | 3.71615700  | -0.61372200 | 0.08294400  |
| H  | 2.82471500  | 0.87538900  | 0.47419600  |
| C  | -2.60325200 | -0.77690500 | 0.36777600  |
| H  | -2.66798300 | -1.54379100 | -0.42256300 |
| H  | -2.38783000 | -1.30309500 | 1.31500900  |
| H  | -3.60560600 | -0.32315000 | 0.46899100  |
| C  | -0.40808800 | 2.52407400  | -0.08511000 |
| H  | -0.89887100 | 2.52413100  | 0.89832300  |
| H  | 0.18062500  | 3.45208100  | -0.17553500 |
| H  | -1.20971700 | 2.55152500  | -0.83620000 |
| O  | -0.35951700 | -1.22577800 | -1.44526900 |
| H  | 0.49008700  | -1.59497500 | -1.71926300 |
| F  | 0.09939400  | -0.87155300 | 1.39107400  |

**CH<sub>3</sub>OH**

0 1

|   |             |             |             |
|---|-------------|-------------|-------------|
| C | 0.66166400  | -0.01944200 | 0.00000000  |
| H | 1.08220100  | 0.98943900  | 0.00000000  |
| H | 1.03826800  | -0.54291400 | 0.89182300  |
| H | 1.03826800  | -0.54291500 | -0.89182300 |
| O | -0.74936700 | 0.12204500  | 0.00000000  |
| H | -1.13378800 | -0.76331900 | 0.00000000  |

**F2-IM1**

-1 1

|    |             |             |             |
|----|-------------|-------------|-------------|
| Si | 0.20076800  | 0.06423700  | 0.49611100  |
| O  | -0.01586400 | -1.56317000 | 0.02973200  |
| O  | 1.20802200  | 0.36870900  | 1.83376400  |
| O  | -0.75663000 | 1.27119300  | -0.27310700 |
| O  | 1.52144400  | 0.36820900  | -0.62400100 |
| C  | -0.18216900 | -1.93910700 | -1.31278000 |
| H  | 0.00840300  | -3.01921200 | -1.41227700 |
| H  | -1.21347800 | -1.74477100 | -1.64568500 |
| H  | 0.50660200  | -1.40723400 | -1.98512900 |
| C  | -0.29699300 | 2.16006900  | -1.26326500 |
| H  | -0.01004300 | 1.64741500  | -2.19083200 |
| H  | -1.11085900 | 2.86525000  | -1.49165900 |
| H  | 0.57744400  | 2.73386100  | -0.93215300 |
| C  | 2.73707500  | -0.30015200 | -0.47513600 |
| H  | 2.61771500  | -1.39716200 | -0.43535600 |
| H  | 3.39123000  | -0.07291700 | -1.33494200 |
| H  | 3.27092000  | -0.00181000 | 0.44086700  |
| F  | -1.12072200 | -0.12150200 | 1.60158500  |
| H  | -2.58526400 | 0.41757600  | -0.54120900 |
| O  | -3.16799400 | -0.32148300 | -0.29450300 |
| H  | -2.67541300 | -0.60497800 | 0.49468500  |
| H  | 0.63919500  | 0.26566200  | 2.60588500  |

**F2-TS**

-1 1

|    |             |             |             |
|----|-------------|-------------|-------------|
| Si | 0.08768500  | -0.07257500 | 0.28321300  |
| O  | 1.00560400  | -1.22793400 | -0.67940100 |
| O  | -1.06765600 | 0.74414500  | 1.29204500  |
| O  | -1.43420500 | -0.69788900 | -0.86229100 |
| O  | 0.41991900  | 1.28148600  | -0.72738300 |
| C  | 2.31959700  | -0.93118700 | -1.04694700 |
| H  | 3.00722300  | -0.89462000 | -0.18438100 |
| H  | 2.68767700  | -1.71243600 | -1.73386400 |
| H  | 2.39424100  | 0.03656200  | -1.56562200 |
| C  | -2.58371600 | 0.10110800  | -0.99852700 |
| H  | -2.30251300 | 1.07098500  | -1.42819900 |
| H  | -3.29993400 | -0.38607700 | -1.68151000 |
| H  | -3.07703900 | 0.29764900  | -0.03803700 |
| C  | 0.62615500  | 2.55396000  | -0.18468000 |
| H  | 1.55227000  | 2.61291500  | 0.41357100  |
| H  | 0.71959500  | 3.28493700  | -1.00554200 |
| H  | -0.20074500 | 2.86973200  | 0.46694700  |
| O  | -0.70492400 | -1.77142600 | 1.03423600  |
| H  | -0.04351400 | -2.38814900 | 0.68403600  |
| H  | -1.36596600 | -1.47335800 | 0.06254900  |

|   |             |            |            |
|---|-------------|------------|------------|
| F | 1.31602700  | 0.05047000 | 1.42620300 |
| H | -1.06525600 | 0.27333000 | 2.13253500 |

**F2-IM2**

-1 1

|    |             |             |             |
|----|-------------|-------------|-------------|
| Si | 0.55201400  | -0.08607400 | 0.33135800  |
| O  | 1.59538800  | -1.18026900 | -0.59348500 |
| O  | -0.63936500 | 0.89587600  | 1.15083700  |
| O  | -3.16776800 | -0.97069000 | -0.83693500 |
| O  | 0.92809400  | 1.16233900  | -0.76295700 |
| C  | 2.93780700  | -0.89006100 | -0.82971300 |
| H  | 3.51550300  | -0.77201100 | 0.10412000  |
| H  | 3.40138700  | -1.71510500 | -1.39773700 |
| H  | 3.06856500  | 0.03391000  | -1.41580300 |
| C  | -3.70841200 | 0.07299400  | -0.06063900 |
| H  | -4.46418200 | 0.60698600  | -0.65555800 |
| H  | -4.22148800 | -0.29221100 | 0.85165200  |
| H  | -2.94100500 | 0.79102900  | 0.25526700  |
| C  | 0.44046200  | 2.47681800  | -0.68942500 |
| H  | 0.63324500  | 2.94938700  | 0.28346100  |
| H  | 0.94165400  | 3.07431600  | -1.46743000 |
| H  | -0.64308500 | 2.53111000  | -0.86061600 |
| O  | -0.63470900 | -1.34660300 | 0.18981100  |
| H  | -0.17168900 | -2.06213000 | -0.26818800 |
| H  | -2.25981400 | -1.13045900 | -0.49136800 |
| F  | 1.53914400  | -0.17516400 | 1.66209900  |
| H  | -1.11185400 | 0.32296700  | 1.76478900  |

**F2-P**

-1 1

|    |             |             |             |
|----|-------------|-------------|-------------|
| Si | -0.08197000 | -0.40770500 | 0.01291500  |
| O  | 1.57151100  | 0.02665000  | -0.51429900 |
| O  | -1.71282700 | -0.92675200 | 0.36112000  |
| O  | -0.57141100 | 1.18936800  | -0.36744400 |
| C  | 2.27275000  | 1.07690100  | 0.06648200  |
| H  | 2.43420300  | 0.93432300  | 1.15071700  |
| H  | 3.27127400  | 1.16649300  | -0.39999800 |
| H  | 1.76162400  | 2.04642700  | -0.06024900 |
| C  | -1.87535800 | 1.67732200  | -0.21176200 |
| H  | -2.19608700 | 1.71227500  | 0.84167400  |
| H  | -1.91176800 | 2.70730100  | -0.60509100 |
| H  | -2.61959500 | 1.07213900  | -0.74489100 |
| O  | 0.08600400  | -1.75776800 | -1.03843400 |
| H  | 0.98887000  | -1.68780800 | -1.37504800 |
| F  | 0.42226900  | -0.57484500 | 1.58623000  |
| H  | -1.75192600 | -1.84700300 | 0.08014300  |

**F3-IM1**

-1 1

|    |             |             |             |
|----|-------------|-------------|-------------|
| Si | 0.36823500  | -0.45015600 | 0.01351700  |
| O  | -1.34413100 | -0.24419400 | -0.36751800 |
| O  | 2.08271600  | -0.68690300 | 0.44070500  |
| O  | 0.55892100  | 1.20941300  | -0.36537600 |
| O  | 0.51703000  | -1.65947900 | -1.17378500 |
| C  | -2.21128600 | -1.33156000 | -0.21585300 |
| H  | -2.28229500 | -1.67205500 | 0.83142000  |
| H  | -3.22354900 | -1.03823200 | -0.53723300 |
| H  | -1.90180400 | -2.19396500 | -0.82612800 |
| C  | 1.79400900  | 1.87942600  | -0.36421000 |
| H  | 2.51854600  | 1.43595000  | -1.06035300 |
| H  | 1.61579000  | 2.92061200  | -0.67392400 |
| H  | 2.27254000  | 1.89248900  | 0.62453400  |
| O  | -2.03902500 | 2.40497200  | 0.23271600  |
| H  | -2.07687200 | 1.44061100  | 0.06724300  |
| H  | -1.09149300 | 2.50420700  | 0.05356300  |
| F  | -0.02353700 | -0.85348500 | 1.59287200  |
| H  | 2.10690300  | -0.79797100 | 1.39685300  |
| H  | 1.41835700  | -1.98576800 | -1.05460100 |

**F3-TS**

-1 1

|    |             |             |             |
|----|-------------|-------------|-------------|
| Si | 0.13679500  | 0.31358100  | -0.11090400 |
| O  | 1.20950100  | -0.93415700 | 0.50266500  |
| O  | -1.12978200 | 1.48079000  | -0.40569500 |
| O  | -1.30632500 | -1.03676400 | 0.34131100  |
| O  | 0.25426000  | -0.13869400 | -1.76005800 |
| C  | 2.45869600  | -1.11605400 | -0.09684000 |
| H  | 3.10502300  | -0.22638000 | -0.01046300 |
| H  | 2.97730700  | -1.95582600 | 0.39710400  |
| H  | 2.37587900  | -1.35531800 | -1.16794200 |
| C  | -2.56236300 | -0.95229900 | -0.27849600 |
| H  | -2.43953600 | -1.01882500 | -1.36844000 |
| H  | -3.20291100 | -1.79153000 | 0.04403700  |
| H  | -3.07962600 | -0.00674000 | -0.06577800 |
| O  | -0.38972600 | 0.44238700  | 1.83643500  |
| H  | 0.35467900  | -0.06273100 | 2.19840800  |
| H  | -1.09898000 | -0.39498100 | 1.35427800  |
| F  | 1.31380700  | 1.50975000  | 0.03298200  |
| H  | -0.99457500 | 2.18025000  | 0.24322000  |
| H  | -0.21806900 | 0.55582900  | -2.23384700 |

**F3-IM2**

-1 1



|    |             |             |             |
|----|-------------|-------------|-------------|
| Si | -0.59224500 | 0.29433000  | -0.06966300 |
| O  | -1.68682500 | -1.09783100 | -0.09690600 |
| O  | 0.64188300  | 1.55391100  | -0.00645500 |
| O  | 3.11260500  | -1.20275700 | 0.05469800  |
| O  | -0.86201000 | 0.51836100  | 1.59154400  |
| C  | -3.00792600 | -0.98313500 | 0.33174800  |
| H  | -3.58000900 | -0.24268700 | -0.25533800 |
| H  | -3.52160700 | -1.95388700 | 0.21997000  |
| H  | -3.08179600 | -0.68826200 | 1.39112900  |
| C  | 3.66549100  | 0.08068600  | 0.23355000  |
| H  | 4.44425400  | 0.02996400  | 1.00913300  |
| H  | 4.15452200  | 0.46788800  | -0.68289500 |
| H  | 2.91053900  | 0.81521900  | 0.54117700  |
| O  | 0.54459700  | -0.74757500 | -0.85827700 |
| H  | 0.06007700  | -1.57351800 | -0.99567100 |
| H  | 2.19221800  | -1.06679100 | -0.26800800 |
| F  | -1.56164300 | 1.16496400  | -1.09421500 |
| H  | 1.10004700  | 1.58480000  | -0.85350200 |
| H  | -0.27941900 | 1.24379700  | 1.84860600  |

**F3-P**

-1 1

|    |             |             |             |
|----|-------------|-------------|-------------|
| Si | 0.36073100  | 0.01735900  | -0.00977100 |
| O  | -1.29512200 | 0.63392500  | -0.27898300 |
| O  | 2.04895600  | -0.48656500 | 0.12199700  |
| O  | 0.04325900  | -1.33068800 | -1.00605000 |
| C  | -2.40728500 | -0.14214400 | 0.02641800  |
| H  | -2.45806600 | -0.41195700 | 1.09747500  |
| H  | -3.33337200 | 0.41414500  | -0.21028700 |
| H  | -2.43612400 | -1.08542900 | -0.54551400 |
| O  | 0.89557500  | 1.57894300  | -0.48046800 |
| H  | 0.08011400  | 2.07469400  | -0.63002200 |
| F  | 0.05837800  | -0.23381400 | 1.60133700  |
| H  | 2.56955700  | 0.32186800  | 0.06626300  |
| H  | 0.90462500  | -1.76408800 | -1.06363600 |

**F4-IM1**

-1 1

|    |             |             |             |
|----|-------------|-------------|-------------|
| Si | -0.57611600 | -0.10852900 | -0.05590900 |
| O  | 0.92739600  | 0.77354900  | -0.28303700 |
| O  | -2.07868100 | -1.08651400 | 0.20516300  |
| O  | 0.20571900  | -1.51564200 | -0.61881500 |
| O  | -1.43299600 | 0.94270700  | -1.07772300 |
| C  | 0.99345300  | 2.12855500  | 0.05640700  |
| H  | 0.82531900  | 2.30177400  | 1.13309400  |
| H  | 1.99413100  | 2.51893700  | -0.18913200 |

|   |             |             |             |
|---|-------------|-------------|-------------|
| H | 0.25420300  | 2.72969400  | -0.49549200 |
| O | 2.96689000  | -1.16758700 | 0.07081800  |
| H | 2.49927900  | -0.31074400 | 0.02477900  |
| H | 2.21514600  | -1.71571400 | -0.20759500 |
| F | -0.59009200 | 0.25160700  | 1.57794100  |
| H | -2.27153800 | -1.01985100 | 1.14671200  |
| H | -2.33659600 | 0.60332500  | -1.03572500 |
| H | -0.47083900 | -2.19590100 | -0.50507900 |

**F4-TS**

-1 1

|    |             |             |             |
|----|-------------|-------------|-------------|
| Si | -0.45556000 | -0.15574500 | -0.02582800 |
| O  | -0.92614000 | 0.66924900  | -1.48681400 |
| O  | 0.21397900  | -0.64494300 | 1.50759100  |
| O  | 1.40265000  | 0.47462400  | -0.58594500 |
| O  | -0.30354500 | -1.72712800 | -0.69145900 |
| C  | 2.52999800  | -0.20760100 | -0.09982600 |
| H  | 2.46159600  | -1.26667300 | -0.38063900 |
| H  | 3.44911100  | 0.20921400  | -0.54599400 |
| H  | 2.61208200  | -0.16462000 | 0.99462000  |
| O  | -0.05008500 | 1.74576900  | 0.67770100  |
| H  | -0.52063400 | 2.22874300  | -0.01725800 |
| H  | 0.95524700  | 1.33702300  | 0.08112100  |
| F  | -2.05106800 | -0.14999000 | 0.53298800  |
| H  | 0.01936100  | 0.07292300  | 2.12081100  |
| H  | -0.13610700 | -2.29948800 | 0.06731600  |
| H  | -1.87806200 | 0.51827000  | -1.52491100 |

**F4-IM2**

-1 1

|    |             |             |             |
|----|-------------|-------------|-------------|
| Si | 0.93585100  | -0.05054500 | -0.02507800 |
| O  | 1.71000900  | 1.43666200  | 0.49794200  |
| O  | -0.08085000 | -1.45383800 | -0.37132400 |
| O  | -2.86362600 | 0.89032100  | 0.11848800  |
| O  | 1.12821400  | -0.67047600 | 1.56370200  |
| C  | -3.24658900 | -0.46575100 | 0.13335000  |
| H  | -3.97886700 | -0.62499200 | 0.93931500  |
| H  | -3.73825900 | -0.78095600 | -0.80893900 |
| H  | -2.39046500 | -1.13161400 | 0.29919600  |
| O  | -0.26653200 | 0.94560600  | -0.80813800 |
| H  | 0.04449600  | 1.84604200  | -0.64001800 |
| H  | -1.94000100 | 0.91690300  | -0.22532500 |
| F  | 2.12811300  | -0.48270300 | -1.08292500 |
| H  | -0.51993300 | -1.31102300 | -1.21707600 |
| H  | 0.66013000  | -1.51436400 | 1.57115500  |
| H  | 2.06977900  | 1.26025700  | 1.37364100  |

**F4-P**

-1 1

|    |             |             |             |
|----|-------------|-------------|-------------|
| Si | 0.00036100  | 0.00011400  | 0.01592300  |
| O  | 1.76621200  | -0.02838400 | -0.11784300 |
| O  | -1.76648000 | 0.03249400  | -0.11675400 |
| O  | 0.02263100  | 1.57991300  | -0.67745300 |
| O  | -0.02356000 | -1.57229000 | -0.69359100 |
| H  | 0.91203500  | -1.75860900 | -0.84433000 |
| F  | 0.00078500  | -0.01196800 | 1.66987500  |
| H  | -2.02133900 | -0.86162800 | -0.36825700 |
| H  | -0.91296600 | 1.76516200  | -0.82947800 |
| H  | 2.01973200  | 0.86732500  | -0.36460800 |

**C1-1-P**

0 1

|    |             |             |             |
|----|-------------|-------------|-------------|
| Si | -0.00144500 | -0.00383200 | 0.31054300  |
| O  | -0.70484900 | 0.14317600  | 1.79484900  |
| H  | -0.16429500 | -0.16871000 | 2.52921300  |
| O  | 0.91633100  | -1.36658200 | 0.37164900  |
| O  | 1.00460500  | 1.22408000  | -0.10955400 |
| O  | -1.21313600 | -0.01338800 | -0.79910200 |
| C  | 1.90341800  | -1.70592800 | -0.59802500 |
| H  | 2.56404900  | -0.85796900 | -0.80653800 |
| H  | 2.49803300  | -2.53260600 | -0.19969500 |
| H  | 1.43792500  | -2.03178600 | -1.53617900 |
| C  | 0.56473800  | 2.52198700  | -0.49584600 |
| H  | 0.14389600  | 3.06630400  | 0.35836300  |
| H  | 1.43122300  | 3.07541100  | -0.86792200 |
| H  | -0.19060300 | 2.46683700  | -1.28694800 |
| C  | -2.39763100 | -0.79461000 | -0.67745500 |
| H  | -2.85406600 | -0.67668000 | 0.31118600  |
| H  | -3.10597300 | -0.45625100 | -1.43866600 |
| H  | -2.18670600 | -1.85788300 | -0.84520700 |

**dF1-IM1**

-1 1

|    |             |             |             |
|----|-------------|-------------|-------------|
| Si | 2.22134400  | 0.05751000  | -0.03905000 |
| O  | -4.69388000 | -0.65038300 | -0.03094200 |
| H  | -4.98647000 | -0.90933500 | 0.85050900  |
| O  | 0.62420600  | 0.74179600  | -0.33647000 |
| O  | 1.71161500  | -1.28889400 | -1.01468200 |
| O  | 1.88096500  | 0.20998600  | 1.63376300  |
| O  | 3.10448700  | 1.30935500  | -0.79164800 |
| C  | 2.52721800  | 2.46884100  | -1.32982600 |
| H  | 1.84635400  | 2.26071400  | -2.16883300 |
| H  | 1.95227200  | 3.04387400  | -0.59095200 |

|    |             |             |             |
|----|-------------|-------------|-------------|
| H  | 3.33718600  | 3.11189000  | -1.70832100 |
| C  | 2.82356300  | -0.05526800 | 2.64073200  |
| H  | 2.36373600  | 0.17966000  | 3.61289600  |
| H  | 3.14185300  | -1.10676400 | 2.65852300  |
| H  | 3.73464600  | 0.55274300  | 2.54430100  |
| C  | 2.56021900  | -2.34454200 | -1.39467700 |
| H  | 2.93815200  | -2.91151100 | -0.53395500 |
| H  | 1.98912500  | -3.03258600 | -2.03666900 |
| H  | 3.43538000  | -1.99911300 | -1.96244300 |
| Si | -3.13621400 | -0.07618200 | 0.02874100  |
| O  | -2.59758100 | -0.64969200 | 1.47427200  |
| O  | -3.20458900 | 1.55995800  | -0.07673700 |
| O  | -2.27003100 | -0.61820100 | -1.25863400 |
| C  | -1.34496100 | -0.29037900 | 2.08652000  |
| H  | -0.56077800 | -0.07521400 | 1.35502000  |
| H  | -1.48637200 | 0.58928700  | 2.72630800  |
| H  | -1.03022600 | -1.12985100 | 2.71394500  |
| C  | -2.17741600 | 2.41172000  | -0.59107400 |
| H  | -2.28839300 | 2.51681600  | -1.67773500 |
| H  | -2.30737100 | 3.39926300  | -0.13438000 |
| H  | -1.17117300 | 2.03920700  | -0.37190000 |
| C  | -1.64995200 | -1.90668200 | -1.30121200 |
| H  | -0.57235300 | -1.80273300 | -1.13678100 |
| H  | -2.06186200 | -2.58834700 | -0.54712100 |
| H  | -1.82741500 | -2.34097500 | -2.29162800 |
| F  | 3.69141300  | -0.71894600 | 0.27949200  |
| H  | 0.26561300  | 0.32135500  | -1.12604400 |

**dF1-TS**

-1 1

|    |             |             |             |
|----|-------------|-------------|-------------|
| Si | -1.68266700 | -0.16781800 | 0.22129500  |
| O  | 1.97356600  | -0.34103700 | -1.94181100 |
| H  | 1.81368100  | 0.36859300  | -2.57765600 |
| O  | 0.16390600  | -0.06892800 | 0.43745200  |
| H  | 0.69317600  | -1.07922900 | 0.58696000  |
| O  | -1.32837300 | -1.11055500 | -1.14845000 |
| O  | -1.68252800 | 1.52261300  | 0.19644800  |
| O  | -1.84747200 | -0.93663700 | 1.71768900  |
| C  | -0.92406300 | -0.95667200 | 2.77711300  |
| H  | -0.06760600 | -1.61838200 | 2.58281300  |
| H  | -0.52224000 | 0.03902000  | 3.00539700  |
| H  | -1.44098900 | -1.33267400 | 3.67168800  |
| C  | -2.84684200 | 2.29626100  | 0.03095500  |
| H  | -2.55162500 | 3.35449000  | 0.04189100  |
| H  | -3.35658200 | 2.09351300  | -0.91985900 |

|    |             |             |             |
|----|-------------|-------------|-------------|
| H  | -3.57864400 | 2.13478600  | 0.83396400  |
| C  | -2.31138400 | -1.69443400 | -1.97163100 |
| H  | -2.99656800 | -0.95250600 | -2.40103800 |
| H  | -1.79806700 | -2.20814000 | -2.79548000 |
| H  | -2.92465500 | -2.43188500 | -1.43590200 |
| Si | 1.60089000  | 0.31681100  | -0.44475300 |
| O  | 1.20839200  | 1.83640200  | -1.09563900 |
| O  | 2.85087300  | 0.85225800  | 0.53818500  |
| O  | 1.82662500  | -1.58050600 | 0.30695800  |
| C  | 1.02950100  | 2.99348000  | -0.31344900 |
| H  | 0.18319300  | 2.88390100  | 0.37371400  |
| H  | 1.93482800  | 3.23508300  | 0.26247200  |
| H  | 0.81677500  | 3.83928700  | -0.98397500 |
| C  | 3.68112900  | 0.10556500  | 1.39320200  |
| H  | 4.22393100  | -0.68620800 | 0.86241900  |
| H  | 4.41438500  | 0.79543000  | 1.83515500  |
| H  | 3.12067800  | -0.37414500 | 2.20481900  |
| C  | 1.79659500  | -2.72211900 | -0.52140900 |
| H  | 0.89742400  | -2.75158500 | -1.15042200 |
| H  | 2.66880900  | -2.74319600 | -1.18685700 |
| H  | 1.81622900  | -3.63147000 | 0.10156700  |
| F  | -3.34119900 | -0.28244000 | -0.02651100 |

**dF1-IM2**

-1 1

|    |             |             |             |
|----|-------------|-------------|-------------|
| Si | -1.42062200 | -0.09152700 | 0.27583800  |
| O  | 1.49265500  | -0.10228000 | -1.92887400 |
| H  | 0.61539400  | -0.54005900 | -1.95715800 |
| O  | 0.33877400  | 0.15129000  | 0.47226700  |
| H  | 0.85865400  | -1.84364900 | 0.38108000  |
| O  | -1.01514200 | -1.00756600 | -1.15373200 |
| O  | -1.60945500 | 1.59967200  | 0.18732300  |
| O  | -1.58459200 | -0.86035000 | 1.77048200  |
| C  | -0.60651200 | -0.97823300 | 2.77661200  |
| H  | 0.14239200  | -1.74304000 | 2.53468300  |
| H  | -0.07668300 | -0.03605600 | 2.96296500  |
| H  | -1.11253700 | -1.28022400 | 3.70536900  |
| C  | -2.85419700 | 2.23994500  | 0.03252700  |
| H  | -2.67520300 | 3.32364500  | -0.00622500 |
| H  | -3.36890000 | 1.94455600  | -0.89059100 |
| H  | -3.53905000 | 2.03539500  | 0.86686200  |
| C  | -1.97936900 | -1.66020100 | -1.95778600 |
| H  | -2.66673600 | -0.95321300 | -2.43837300 |
| H  | -1.44620500 | -2.21319800 | -2.74298300 |
| H  | -2.58440800 | -2.36841600 | -1.38127500 |

|    |             |             |             |
|----|-------------|-------------|-------------|
| Si | 1.45805200  | 0.77996100  | -0.53058700 |
| O  | 1.24278500  | 2.36143500  | -0.97844400 |
| O  | 2.93975800  | 0.78008800  | 0.22562800  |
| O  | 1.31519900  | -2.69960100 | 0.48387800  |
| C  | 1.05147400  | 3.37438300  | -0.00764700 |
| H  | 0.12617400  | 3.20189200  | 0.55223500  |
| H  | 1.89778900  | 3.42706900  | 0.69290900  |
| H  | 0.98124600  | 4.33867600  | -0.52670800 |
| C  | 3.31936800  | -0.14895800 | 1.22637500  |
| H  | 3.11239800  | -1.18543500 | 0.93897400  |
| H  | 4.39658600  | -0.03651500 | 1.40406700  |
| H  | 2.79280000  | 0.04764600  | 2.17015500  |
| C  | 1.22772900  | -3.39548700 | -0.74406400 |
| H  | 1.62610900  | -2.80836100 | -1.58201200 |
| H  | 1.82624800  | -4.30934500 | -0.64658000 |
| H  | 0.19624900  | -3.68840800 | -0.98912400 |
| F  | -3.05968200 | -0.36902600 | -0.00734500 |

**dF1-P**

-1 1

|    |             |             |             |
|----|-------------|-------------|-------------|
| Si | 1.33457600  | -0.19071500 | -0.19525400 |
| O  | -1.58792800 | -0.38696300 | 1.94704900  |
| H  | -0.64384900 | -0.65454000 | 2.01767400  |
| O  | -0.40461200 | -0.13249000 | -0.45859200 |
| O  | 1.01944000  | -0.90622400 | 1.36143100  |
| O  | 1.37179200  | 1.51299300  | -0.35650500 |
| O  | 1.61144000  | -1.18110700 | -1.54625400 |
| C  | 0.63381700  | -1.65054100 | -2.43722000 |
| H  | -0.01484500 | -2.41405200 | -1.98178300 |
| H  | -0.01978700 | -0.85418900 | -2.81273600 |
| H  | 1.14640900  | -2.11522500 | -3.29339900 |
| C  | 2.55273800  | 2.27689500  | -0.30971700 |
| H  | 2.27848100  | 3.33481000  | -0.43192900 |
| H  | 3.08957600  | 2.17007500  | 0.64192000  |
| H  | 3.25856700  | 2.01345200  | -1.10972800 |
| C  | 2.03413400  | -1.35458800 | 2.23544400  |
| H  | 2.67333800  | -0.53574200 | 2.58871600  |
| H  | 1.55125800  | -1.81780600 | 3.10723900  |
| H  | 2.68557600  | -2.09893300 | 1.76311500  |
| Si | -1.72197200 | 0.20424900  | 0.41186800  |
| O  | -2.08455000 | 1.82109800  | 0.49019300  |
| O  | -3.07459300 | -0.46507600 | -0.31015500 |
| C  | -1.71673100 | 2.71588200  | -0.54649000 |
| H  | -0.67418900 | 2.56760800  | -0.84575200 |
| H  | -2.36701700 | 2.60055600  | -1.42733900 |

|   |             |             |             |
|---|-------------|-------------|-------------|
| H | -1.84181700 | 3.74060700  | -0.17301100 |
| C | -3.15482300 | -1.85981600 | -0.50890200 |
| H | -3.04791600 | -2.41368700 | 0.43472900  |
| H | -4.13810700 | -2.09763300 | -0.93552200 |
| H | -2.38202800 | -2.21793000 | -1.20330300 |
| F | 2.99635500  | -0.25130100 | 0.11250000  |

**C1-2-P**

0 1

|    |             |             |             |
|----|-------------|-------------|-------------|
| Si | 0.00237300  | 0.40008200  | -0.00197900 |
| O  | -0.38290800 | 0.73521500  | 1.56555900  |
| O  | 1.58968300  | 0.09417800  | -0.29519600 |
| O  | -0.81506200 | -0.96361600 | -0.41038200 |
| C  | 2.24235500  | -1.12074900 | 0.06392200  |
| H  | 1.67498300  | -1.99203000 | -0.27933100 |
| H  | 3.22801600  | -1.12652600 | -0.40907200 |
| H  | 2.37579000  | -1.18866500 | 1.15032200  |
| C  | -2.18889200 | -1.19192400 | -0.11210200 |
| H  | -2.83623400 | -0.57204300 | -0.74419500 |
| H  | -2.40854800 | -2.24369700 | -0.31476000 |
| H  | -2.40974900 | -0.97773200 | 0.93900900  |
| O  | -0.37254900 | 1.74643100  | -0.87840500 |
| H  | 0.10895300  | 1.82758100  | -1.70957800 |
| H  | -0.24052300 | 1.65034300  | 1.83178400  |

**dF2-IM1**

-1 1

|    |             |             |             |
|----|-------------|-------------|-------------|
| Si | 1.74033300  | -0.02151000 | 0.23194100  |
| O  | -3.40292100 | -0.61176400 | -0.41531800 |
| H  | -3.37294100 | -1.35565300 | -1.02701700 |
| O  | 0.00847100  | 0.61318800  | -0.09895700 |
| O  | 2.12775900  | 1.64057300  | 0.19197200  |
| O  | 1.55432600  | -0.86297300 | -1.25187100 |
| O  | 1.24735100  | -0.76871800 | 1.63430000  |
| C  | 2.47978500  | -1.83407200 | -1.69312300 |
| H  | 2.10654000  | -2.25394500 | -2.63636100 |
| H  | 3.47243900  | -1.40374000 | -1.86927400 |
| H  | 2.59705700  | -2.65542200 | -0.97405400 |
| C  | 3.41669400  | 2.13758400  | 0.46083200  |
| H  | 4.16608800  | 1.76801600  | -0.25098500 |
| H  | 3.38189900  | 3.23355100  | 0.38708900  |
| H  | 3.76625700  | 1.87478500  | 1.46849000  |
| Si | -1.76913500 | -0.06981100 | -0.24591000 |
| O  | -1.23375900 | -1.07134000 | -1.48204400 |
| O  | -1.54097100 | -0.58710600 | 1.37496000  |
| O  | -2.12314900 | 1.58862300  | -0.43264400 |

|   |             |             |             |
|---|-------------|-------------|-------------|
| C | -2.41879800 | -1.47619300 | 2.03312900  |
| H | -2.39275300 | -2.48430000 | 1.59378600  |
| H | -2.09578700 | -1.55747300 | 3.07952600  |
| H | -3.45653100 | -1.12962300 | 2.00185300  |
| C | -3.41051800 | 2.09892000  | -0.68244100 |
| H | -3.86915500 | 1.66203000  | -1.57783500 |
| H | -4.10146500 | 1.92084100  | 0.15288600  |
| H | -3.32195300 | 3.18518000  | -0.82847300 |
| F | 3.33472600  | -0.49878500 | 0.41927600  |
| H | -0.00356200 | 1.57744300  | -0.11419700 |
| H | -0.26329000 | -1.01282300 | -1.58467100 |
| H | 0.27802300  | -0.68258800 | 1.72776000  |

**dF2-TS**

-1 1

|    |             |             |             |
|----|-------------|-------------|-------------|
| Si | -1.79456000 | 0.21162600  | -0.44053200 |
| O  | 2.09203500  | 0.90725600  | 1.67254400  |
| H  | 1.83104300  | 0.58093100  | 2.54391000  |
| O  | 0.04102600  | 0.18266900  | -0.36332800 |
| H  | 0.74935200  | 0.84562300  | -0.96423100 |
| O  | -1.59479100 | 1.65111100  | -1.31330900 |
| O  | -1.76937100 | 0.15346200  | 1.27286200  |
| O  | -1.92269800 | -1.26367800 | -1.23548000 |
| C  | -0.87316300 | -2.17940700 | -1.46632000 |
| H  | -0.11337400 | -1.77873300 | -2.14926000 |
| H  | -0.36462000 | -2.47189900 | -0.54070200 |
| H  | -1.30803400 | -3.07827100 | -1.92531900 |
| C  | -2.94546400 | 0.10574700  | 2.05436700  |
| H  | -2.64690400 | 0.00996000  | 3.10651900  |
| H  | -3.54629800 | 1.01629400  | 1.94484400  |
| H  | -3.58607300 | -0.74608300 | 1.79517800  |
| Si | 1.42074200  | -0.21336500 | 0.60422500  |
| O  | 0.62154800  | -1.19233900 | 1.72801900  |
| O  | 2.46240200  | -1.38731500 | 0.02442400  |
| O  | 2.00921700  | 1.06755800  | -0.90490100 |
| C  | 3.66200600  | -1.15538600 | -0.67552900 |
| H  | 4.32916000  | -0.46485500 | -0.13949400 |
| H  | 4.18293800  | -2.11757200 | -0.77860200 |
| H  | 3.48360400  | -0.73384400 | -1.67020000 |
| C  | 2.37666500  | 2.40312800  | -0.66760100 |
| H  | 1.61607900  | 2.95708600  | -0.09693300 |
| H  | 3.31308300  | 2.45981000  | -0.09650500 |
| H  | 2.52730200  | 2.92632800  | -1.62629600 |
| F  | -3.47529300 | 0.39812600  | -0.49131200 |
| H  | -2.48609700 | 1.93285100  | -1.55140500 |



|   |             |             |            |
|---|-------------|-------------|------------|
| H | -0.30528600 | -0.89070600 | 1.76244600 |
|---|-------------|-------------|------------|

**dF2-IM2**

-1 1

|    |             |             |             |
|----|-------------|-------------|-------------|
| Si | 1.43367600  | 0.37194500  | -0.14636900 |
| O  | -1.53948600 | -1.03210100 | -1.59025400 |
| H  | -0.85900300 | -0.43327000 | -1.95804900 |
| O  | -0.18521700 | -0.02030100 | 0.47997400  |
| H  | -1.23256900 | 1.52312500  | 0.33118500  |
| O  | 0.68755800  | 0.66672800  | -1.67782700 |
| O  | 1.95374000  | -1.22558900 | 0.24831100  |
| O  | 1.72864700  | 1.58712600  | 0.97813900  |
| C  | 0.95263200  | 1.89177700  | 2.11685500  |
| H  | 0.07734700  | 2.50091300  | 1.85912300  |
| H  | 0.59557800  | 0.99395800  | 2.63385800  |
| H  | 1.58185500  | 2.46849700  | 2.80978200  |
| C  | 3.28735500  | -1.66590500 | 0.08670600  |
| H  | 3.35366800  | -2.69268500 | 0.47003200  |
| H  | 3.60191500  | -1.66478400 | -0.96374800 |
| H  | 3.99456300  | -1.04108300 | 0.64485100  |
| Si | -1.13698000 | -1.27462400 | 0.00389100  |
| O  | -0.36276200 | -2.69999500 | 0.29794200  |
| O  | -2.55021800 | -1.37393600 | 0.86254700  |
| O  | -1.84914800 | 2.28233600  | 0.25049000  |
| C  | -3.67562900 | -0.55147200 | 0.60452600  |
| H  | -4.05795300 | -0.70268600 | -0.41365600 |
| H  | -4.46567400 | -0.82533500 | 1.31512800  |
| H  | -3.43835800 | 0.51177100  | 0.73055400  |
| C  | -1.98938000 | 2.57535000  | -1.12687600 |
| H  | -2.40948600 | 1.73070200  | -1.69205000 |
| H  | -2.67642000 | 3.42599000  | -1.21655400 |
| H  | -1.03438800 | 2.84474800  | -1.59742200 |
| F  | 2.92387900  | 0.73076000  | -0.88287300 |
| H  | 1.40244600  | 0.90814400  | -2.27951500 |
| H  | 0.58305300  | -2.45997800 | 0.38517200  |

**dF2-P**

-1 1

|    |             |             |             |
|----|-------------|-------------|-------------|
| Si | -1.29047400 | 0.27549000  | 0.27202000  |
| O  | 1.84071200  | -0.88096400 | 1.55347400  |
| H  | 1.01111700  | -0.61751900 | 2.00224900  |
| O  | 0.37341700  | 0.48860100  | -0.22709200 |
| O  | -0.75285400 | 0.05650000  | 1.90038500  |
| O  | -1.39336300 | -1.10165900 | -0.77541300 |
| O  | -1.79540600 | 1.78623700  | -0.29871700 |
| C  | -0.96272700 | 2.71598000  | -0.94669600 |

|    |             |             |             |
|----|-------------|-------------|-------------|
| H  | -0.16245400 | 3.08860900  | -0.29285200 |
| H  | -0.48008000 | 2.29986700  | -1.83986700 |
| H  | -1.58296300 | 3.57191400  | -1.25222700 |
| C  | -2.57775700 | -1.84306600 | -0.97414400 |
| H  | -2.37043500 | -2.62338300 | -1.71956300 |
| H  | -2.92888900 | -2.32847600 | -0.05464500 |
| H  | -3.39840600 | -1.21885000 | -1.34878000 |
| Si | 1.59401000  | -0.57389600 | -0.05952200 |
| O  | 1.29116700  | -1.93057900 | -0.95416400 |
| O  | 3.02655700  | 0.02608500  | -0.66461200 |
| C  | 3.64122100  | 1.13800800  | -0.05097800 |
| H  | 3.80046300  | 0.97672600  | 1.02399000  |
| H  | 4.61735100  | 1.30519500  | -0.52480700 |
| H  | 3.04070900  | 2.05138400  | -0.17294400 |
| F  | -2.87833300 | 0.00758700  | 0.83018100  |
| H  | -1.54575700 | -0.12298300 | 2.41986700  |
| H  | 0.32856900  | -1.89240400 | -1.12700800 |

**C1-3-P**

0 1

|    |             |             |             |
|----|-------------|-------------|-------------|
| Si | -0.39651200 | 0.00325200  | -0.02714500 |
| O  | -1.48047700 | 1.19558600  | -0.37378300 |
| O  | 1.06569000  | 0.74433900  | 0.07448300  |
| C  | 2.30525600  | 0.04382100  | 0.14129900  |
| H  | 2.41718700  | -0.46526600 | 1.10618000  |
| H  | 2.38757200  | -0.69587300 | -0.66194100 |
| H  | 3.11142800  | 0.77486800  | 0.03757600  |
| O  | -0.93206500 | -0.73297900 | 1.34802000  |
| H  | -1.37061400 | -0.14466000 | 1.97312500  |
| H  | -1.12896300 | 1.90915500  | -0.91836500 |
| O  | -0.25152200 | -1.18233000 | -1.16118500 |
| H  | -0.90999200 | -1.88360900 | -1.10461900 |

**dF3-IM1**

-1 1

|    |             |             |             |
|----|-------------|-------------|-------------|
| Si | -1.77924300 | -0.47439700 | 0.09540500  |
| O  | 3.12689600  | 1.10836100  | 0.61088100  |
| H  | 3.00890400  | 2.01170900  | 0.29584300  |
| O  | 0.04781400  | -0.62666100 | -0.28401000 |
| O  | -1.89813000 | -1.95412300 | -0.73666700 |
| O  | -1.70387800 | 0.98727600  | -0.79769700 |
| O  | -1.50085100 | -0.38918500 | 1.73253600  |
| C  | -2.77592200 | 1.90546700  | -0.82467900 |
| H  | -2.45175700 | 2.78956700  | -1.38923400 |
| H  | -3.66355800 | 1.48500000  | -1.31224000 |
| H  | -3.07265000 | 2.23011100  | 0.18125000  |

|    |             |             |             |
|----|-------------|-------------|-------------|
| Si | 1.65461500  | 0.28020800  | 0.18411500  |
| O  | 1.00100200  | 1.68081600  | -0.47509600 |
| O  | 1.30818300  | -0.16384900 | 1.79493100  |
| O  | 2.36302100  | -0.92794000 | -0.78611200 |
| C  | 3.74162000  | -1.00703900 | -1.05411500 |
| H  | 4.13944900  | -0.08242200 | -1.49084200 |
| H  | 4.33353700  | -1.21735400 | -0.15256600 |
| H  | 3.90284100  | -1.82720300 | -1.76855700 |
| F  | -3.45434500 | -0.40189900 | 0.27742900  |
| H  | 0.24178900  | -1.44265100 | -0.75975700 |
| H  | 0.07412500  | 1.54221300  | -0.75096000 |
| H  | -0.54412000 | -0.38621100 | 1.92522500  |
| H  | 1.95148400  | 0.31414900  | 2.33349800  |
| H  | -2.83280600 | -2.18929200 | -0.71916200 |

**dF3-TS**

-1 1

|    |             |             |             |
|----|-------------|-------------|-------------|
| Si | -1.54271600 | -0.58075700 | 0.06437200  |
| O  | 2.79947100  | 1.04495800  | -0.89268800 |
| H  | 2.57849700  | 1.91919800  | -1.23984400 |
| O  | 0.24240900  | -0.40399500 | -0.40008500 |
| H  | 1.06416600  | -1.24073700 | -0.22116000 |
| O  | -1.50225100 | -2.02039700 | -0.82549700 |
| O  | -1.77011800 | 0.93527000  | -0.71168900 |
| O  | -1.20035900 | -0.56292600 | 1.71010700  |
| Si | 1.49883400  | 0.66029800  | 0.10507700  |
| O  | 0.66804400  | 2.13718800  | -0.10029000 |
| O  | 1.70290700  | 0.72145800  | 1.78139800  |
| O  | 2.22962800  | -1.20586900 | 0.19263700  |
| H  | -0.24042200 | 1.93432100  | -0.39884700 |
| H  | -0.25801000 | -0.44692500 | 1.89588800  |
| H  | 1.28818400  | 1.55455600  | 2.04478800  |
| H  | -2.38073000 | -2.40649900 | -0.72732800 |
| F  | -3.19348700 | -0.76885300 | 0.37238300  |
| C  | 3.24853800  | -1.69238900 | -0.64725100 |
| H  | 3.37242700  | -2.77468000 | -0.48811000 |
| H  | 3.03983200  | -1.52247300 | -1.71383600 |
| H  | 4.20120600  | -1.19910000 | -0.41999000 |
| C  | -3.01615100 | 1.59920700  | -0.72894500 |
| H  | -3.77751500 | 1.02938100  | -1.27517400 |
| H  | -3.40612100 | 1.78767500  | 0.27931900  |
| H  | -2.87795800 | 2.56498100  | -1.23340000 |

**dF3-IM2**

-1 1

|    |             |            |             |
|----|-------------|------------|-------------|
| Si | -1.35313200 | 0.23792400 | -0.46956200 |
|----|-------------|------------|-------------|

|    |             |             |             |
|----|-------------|-------------|-------------|
| O  | 2.97503600  | -0.41352200 | 0.12590200  |
| H  | 2.90900800  | 0.56028700  | 0.04552600  |
| O  | 0.42817600  | 0.05560600  | -0.45667300 |
| H  | 1.29955200  | 1.65834500  | -0.54251300 |
| O  | -1.09444900 | 1.90870700  | -0.66853300 |
| O  | -1.39398000 | -0.42530300 | 1.13174000  |
| O  | -1.51169300 | -0.82942800 | -1.77106400 |
| Si | 1.47677000  | -1.09275800 | 0.02800700  |
| O  | 0.95698400  | -1.76642900 | 1.45045100  |
| O  | 1.59554900  | -2.34955600 | -1.07445800 |
| O  | 2.07184100  | 2.22611000  | -0.31166700 |
| H  | 0.07790700  | -1.35321200 | 1.60860500  |
| H  | -0.62413200 | -1.11389700 | -2.02388200 |
| H  | 1.12590500  | -3.12068800 | -0.73673500 |
| H  | -1.96983500 | 2.30346300  | -0.75563000 |
| F  | -3.03074100 | 0.48895100  | -0.46057000 |
| C  | 1.68329000  | 2.99261600  | 0.81376900  |
| H  | 0.75202700  | 3.53916800  | 0.62205200  |
| H  | 1.53144500  | 2.37514400  | 1.71199700  |
| H  | 2.48341500  | 3.71216000  | 1.02504400  |
| C  | -2.59854300 | -0.66518700 | 1.83009400  |
| H  | -3.14892500 | 0.26174300  | 2.03131300  |
| H  | -3.27152200 | -1.33505700 | 1.28129100  |
| H  | -2.34727400 | -1.13438500 | 2.79105200  |

**dF3-P**

-1 1

|    |             |             |             |
|----|-------------|-------------|-------------|
| Si | 1.15387900  | -0.47118900 | -0.16494400 |
| O  | -2.05680700 | -0.72288200 | 1.44532100  |
| H  | -1.18739200 | -1.11315800 | 1.66699000  |
| O  | -0.51497700 | -0.51868300 | -0.74585700 |
| O  | 0.66722000  | -1.31125200 | 1.26019900  |
| O  | 1.06708800  | 1.25919700  | -0.14369000 |
| O  | 1.69043200  | -1.27317600 | -1.55111000 |
| Si | -1.83696900 | 0.06059500  | 0.00640600  |
| O  | -1.68177500 | 1.71297600  | 0.14365100  |
| O  | -3.24171100 | -0.17525000 | -0.86376100 |
| H  | -0.72165100 | 1.87784600  | 0.03993600  |
| H  | 0.89320700  | -1.42765500 | -2.07337900 |
| H  | -3.39666400 | 0.59762000  | -1.41857600 |
| H  | 1.46236100  | -1.41364900 | 1.79651900  |
| F  | 2.74287000  | -0.44540800 | 0.44366800  |
| C  | 2.16669500  | 2.08273100  | 0.17788600  |
| H  | 2.51198400  | 1.93951400  | 1.21009300  |
| H  | 3.02450700  | 1.90250300  | -0.48152300 |

|                           |             |             |             |
|---------------------------|-------------|-------------|-------------|
| H                         | 1.85515800  | 3.13014000  | 0.06113000  |
| <b>Si(OH)<sub>4</sub></b> |             |             |             |
| 0 1                       |             |             |             |
| Si                        | -0.45212500 | -0.14725100 | 0.00808300  |
| O                         | -0.89019700 | -0.32285200 | 1.60881800  |
| O                         | 1.19927100  | 0.53103900  | -0.40780500 |
| O                         | 0.07634600  | -1.74283400 | -0.20625700 |
| C                         | 2.47838100  | 0.01928500  | -0.00951200 |
| H                         | 2.44553100  | -1.06114600 | -0.14602500 |
| H                         | 3.24421200  | 0.46377000  | -0.64876900 |
| H                         | 2.68222800  | 0.25862000  | 1.03880800  |
| O                         | -1.54408900 | -0.04371800 | -1.24717000 |
| H                         | -1.64387100 | -0.91181300 | -1.65806700 |
| H                         | -1.20455700 | 0.51612200  | 1.96828600  |
| O                         | -0.54364000 | 1.74381600  | 0.18674000  |
| H                         | -1.07596600 | 2.11564400  | -0.53002300 |
| H                         | 0.72096200  | 1.50669200  | -0.14108100 |
| H                         | -0.09059900 | -2.26568700 | 0.58617800  |
| <b>dF4-IM1</b>            |             |             |             |
| -1 1                      |             |             |             |
| Si                        | 1.74381300  | 0.02668000  | 0.03133300  |
| O                         | -3.39735100 | -0.52084700 | 0.21144000  |
| H                         | -3.44241000 | -1.36576700 | -0.25094900 |
| O                         | 0.01706500  | 0.65844600  | -0.32370100 |
| H                         | 0.03056600  | 1.58365400  | -0.59492300 |
| O                         | 2.24727100  | 1.57935000  | -0.43928200 |
| O                         | 1.42182400  | -1.16304000 | -1.15195600 |
| O                         | 1.38358000  | -0.31244400 | 1.61822500  |
| Si                        | -1.75191200 | 0.04104800  | -0.03604400 |
| O                         | -1.37776200 | -1.34114300 | -0.91525800 |
| O                         | -1.40352200 | 0.09647200  | 1.63365600  |
| O                         | -2.22047500 | 1.49828200  | -0.76595500 |
| H                         | -0.43732500 | -1.37627700 | -1.17196700 |
| H                         | 2.16971200  | -1.77172400 | -1.13306400 |
| H                         | 0.44384500  | -0.13477200 | 1.81245700  |
| H                         | -2.16139400 | -0.32120300 | 2.06201900  |
| H                         | 3.20869800  | 1.57394500  | -0.36898100 |
| H                         | -3.18396700 | 1.45610300  | -0.80015800 |
| F                         | 3.34673600  | -0.50586300 | 0.17490900  |
| <b>dF4-TS</b>             |             |             |             |
| -1 1                      |             |             |             |
| Si                        | 1.69624200  | 0.05442900  | 0.03937700  |
| O                         | -2.48112100 | 0.02719400  | -1.49552400 |
| H                         | -2.43269700 | -0.86118200 | -1.87171800 |

|    |             |             |             |
|----|-------------|-------------|-------------|
| O  | -0.08547200 | 0.47698800  | 0.17638900  |
| H  | -0.63004400 | 1.52166100  | 0.11041200  |
| O  | 1.91072200  | 1.52904600  | -0.76047800 |
| O  | 1.24718800  | -1.35653300 | -0.81495700 |
| O  | 1.84519900  | -0.01726600 | 1.71557400  |
| Si | -1.71494000 | -0.10811300 | 0.01354600  |
| O  | -1.36655400 | -1.77813700 | -0.08223200 |
| O  | -2.66313200 | -0.19570100 | 1.39972700  |
| O  | -1.84096100 | 1.84281300  | 0.08663300  |
| H  | -0.43658100 | -1.89585800 | -0.35328400 |
| H  | 2.06530100  | -1.84996400 | -0.94731300 |
| H  | 0.97960600  | 0.19258700  | 2.08578000  |
| H  | -2.62139600 | -1.12591500 | 1.65885000  |
| H  | 2.85948900  | 1.59009800  | -0.92495100 |
| H  | -2.09034300 | 2.10174100  | -0.81066700 |
| F  | 3.33794200  | -0.34986900 | -0.16545400 |

**dF4-IM2**

-1 1

|    |             |             |             |
|----|-------------|-------------|-------------|
| Si | 1.46374700  | -0.16882900 | 0.11781900  |
| O  | -2.41925200 | 0.96918200  | -0.67352700 |
| H  | -1.85848600 | 1.77111500  | -0.59900000 |
| O  | -0.22580500 | 0.02964000  | 0.59218100  |
| H  | 0.16239700  | 2.47969900  | -0.42557600 |
| O  | 1.37988800  | 1.28016500  | -0.80707000 |
| O  | 1.11274200  | -1.67205900 | -0.63829600 |
| O  | 1.97109700  | -0.11701100 | 1.72686500  |
| Si | -1.69045900 | -0.35415300 | -0.02076300 |
| O  | -1.55692400 | -1.61006900 | -1.09283900 |
| O  | -2.72978400 | -0.87447300 | 1.18575300  |
| O  | -0.58749700 | 2.97618000  | -0.01795300 |
| H  | -0.60332900 | -1.82715000 | -1.16154400 |
| H  | 1.94439600  | -1.97500900 | -1.02147900 |
| H  | 1.16088300  | -0.05375600 | 2.24780200  |
| H  | -2.63801800 | -1.82710600 | 1.30022800  |
| H  | 2.27333300  | 1.43726300  | -1.13557000 |
| H  | -0.63271000 | 2.53007700  | 0.83977500  |
| F  | 3.08997400  | -0.34064700 | -0.40048200 |

**dF4-P**

-1 1

|    |             |             |             |
|----|-------------|-------------|-------------|
| Si | 1.35581400  | -0.02414900 | 0.15283400  |
| O  | -1.77013400 | 1.52530500  | -0.68267300 |
| H  | -0.85286700 | 1.86085000  | -0.73131400 |
| O  | -0.26633200 | -0.09023200 | 0.84816800  |
| O  | 1.02570200  | 1.54187200  | -0.48339100 |

|    |             |             |             |
|----|-------------|-------------|-------------|
| O  | 0.99897200  | -1.40273300 | -0.81992100 |
| O  | 2.07263500  | -0.20369100 | 1.66937200  |
| Si | -1.66380500 | 0.03278600  | 0.02208500  |
| O  | -1.76872400 | -1.23436400 | -1.05234700 |
| O  | -3.01247200 | -0.10983400 | 0.99509500  |
| H  | -0.85020000 | -1.54943900 | -1.17952600 |
| H  | 1.78688800  | -1.55805700 | -1.35437200 |
| H  | 1.33403200  | -0.25563200 | 2.28888500  |
| H  | -3.27641000 | -1.03637000 | 1.02603700  |
| H  | 1.81922500  | 1.80390100  | -0.96529600 |
| F  | 2.90156000  | 0.04480600  | -0.59196700 |
